# Supplementary material for: Spectroscopic Study on the Interaction between Naphthalimide-Polyamine Conjugates and Bovine Serum Albumin (BSA)
Source: PubMed Central journal article supplement (PMC6332075; doi:10.3390/molecules200916491), 2015-09-11
Supplement: molecules-20-16491-s001.pdf [file molecules-20-16491-s001.pdf]

# Supporting Information

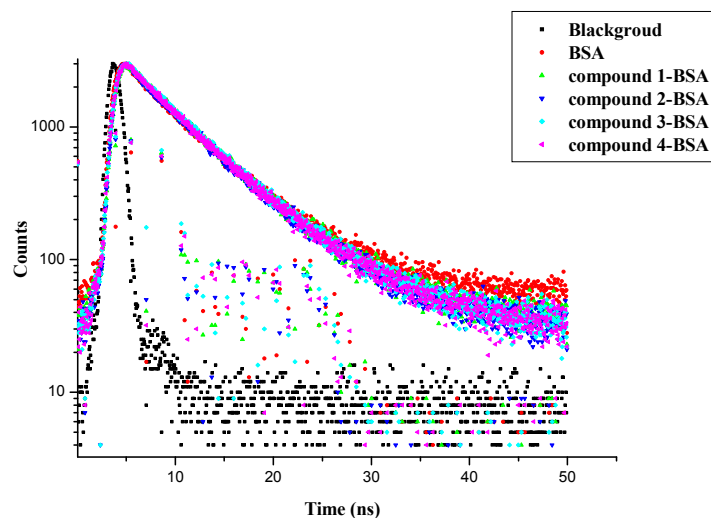

**Figure S1.** The fluorescence lifetimes of the BSA and compounds 1–4-BSA complex;  $c(\text{BSA}) = 1.04 \times 10^{-6} \text{ mol}\cdot\text{L}^{-1}$ ;  $c(\text{compounds 1–4}) = 12.0 \times 10^{-6} \text{ mol}\cdot\text{L}^{-1}$ .

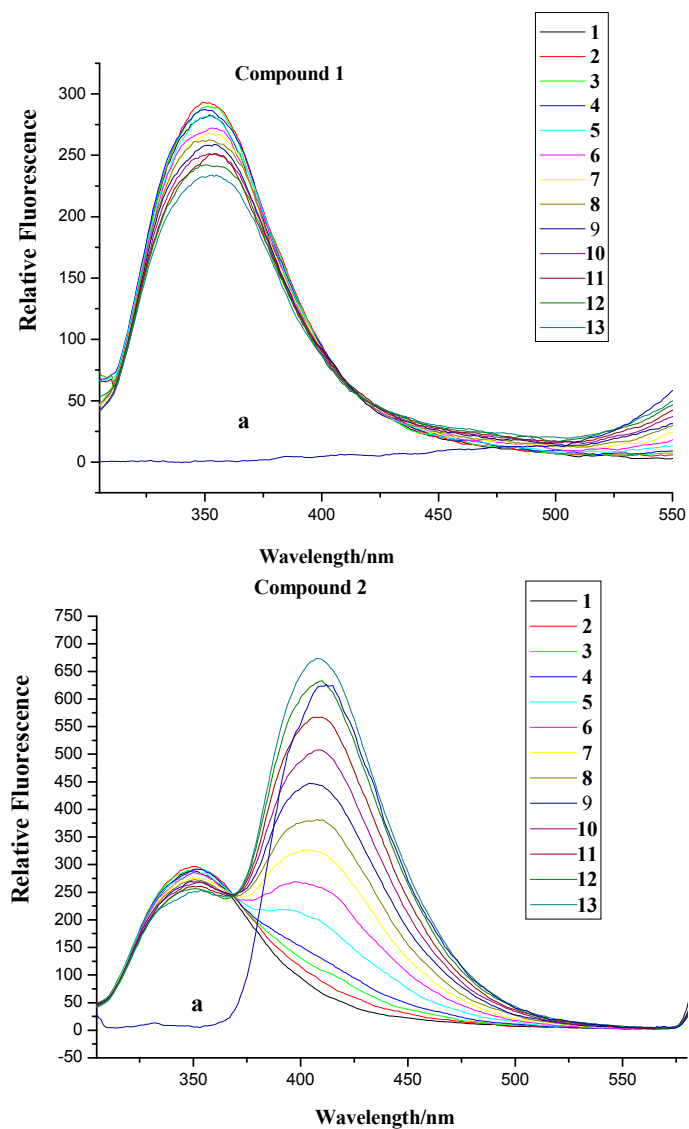

**Figure S2. Cont.**

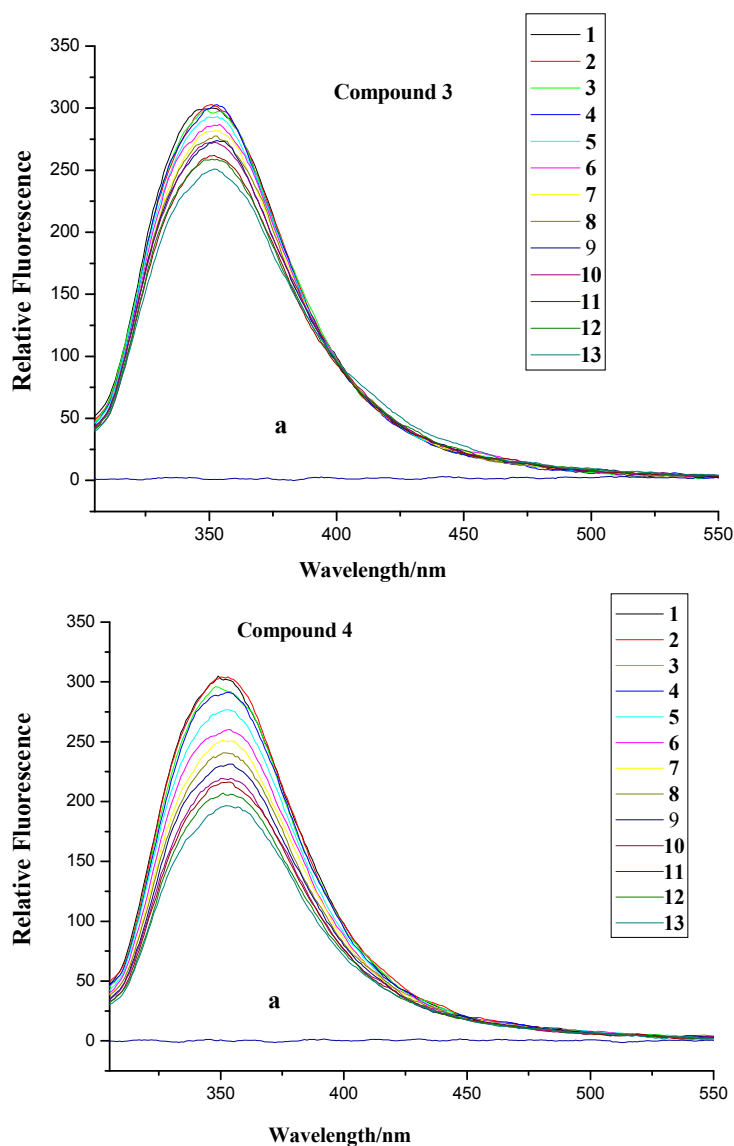

**Figure S2.** Fluorescence spectroscopy of compounds 1–4 and BSA. Numbers 1–13 indicated concentrations of compounds 1–4: 0.0,  $0.4 \times 10^{-6}$ ,  $0.8 \times 10^{-6}$ ,  $1.2 \times 10^{-6}$ ,  $2.4 \times 10^{-6}$ ,  $3.6 \times 10^{-6}$ ,  $4.8 \times 10^{-6}$ ,  $6.0 \times 10^{-6}$ ,  $7.2 \times 10^{-6}$ ,  $8.4 \times 10^{-6}$ ,  $9.6 \times 10^{-6}$ ,  $10.8 \times 10^{-6}$  and  $12 \times 10^{-6}$  mol·L<sup>-1</sup>, respectively. BSA concentration applied was  $1.04 \times 10^{-6}$  mol·L<sup>-1</sup>. Scan condition: Ex = 295 nm, Em = 305–580 nm; slits of both Ex and Em of compounds 1–4 were 5 nm. The blue line “a” was compounds 1–4, which concentration was  $12.0 \times 10^{-6}$  mol·L<sup>-1</sup> and had no BSA.

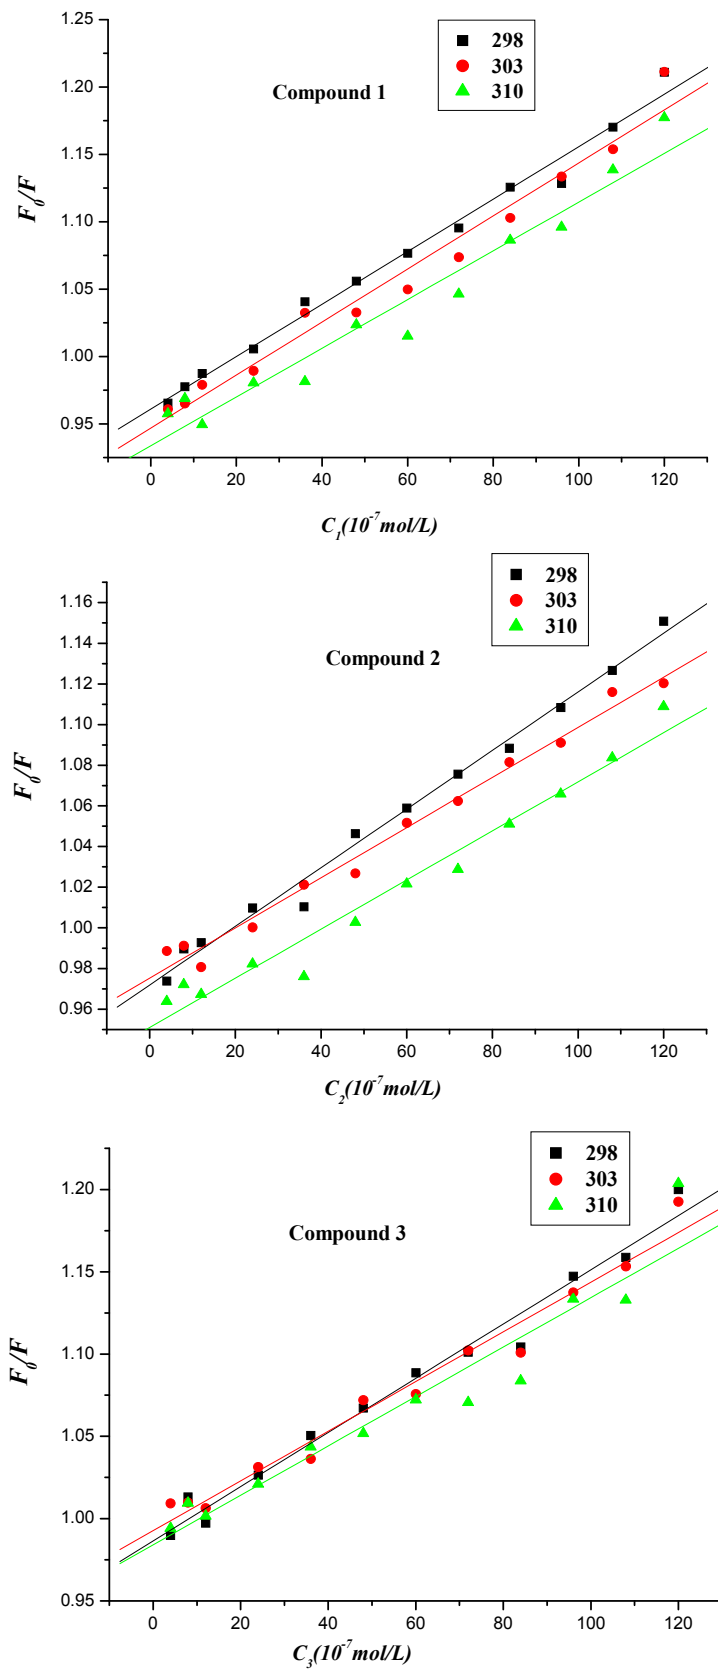

Figure S3. Cont.

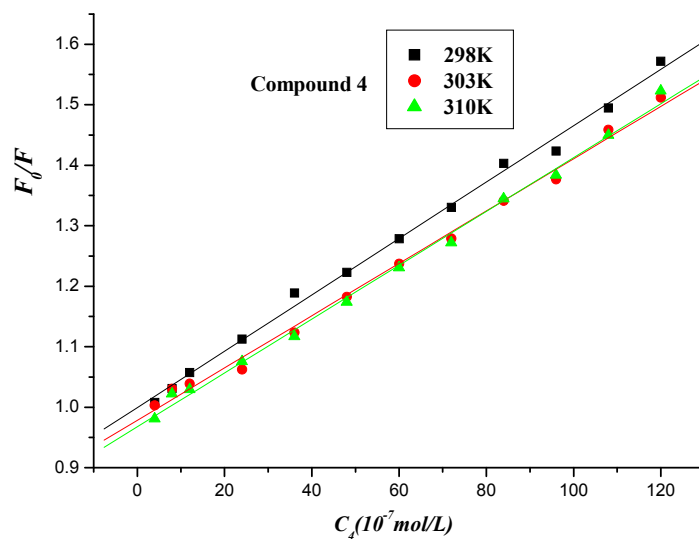

**Figure S3.** Stern-Volmer linear plot of fluorescence quenching of BSA by compounds 1–4 at different temperatures (Ex = 295 nm).

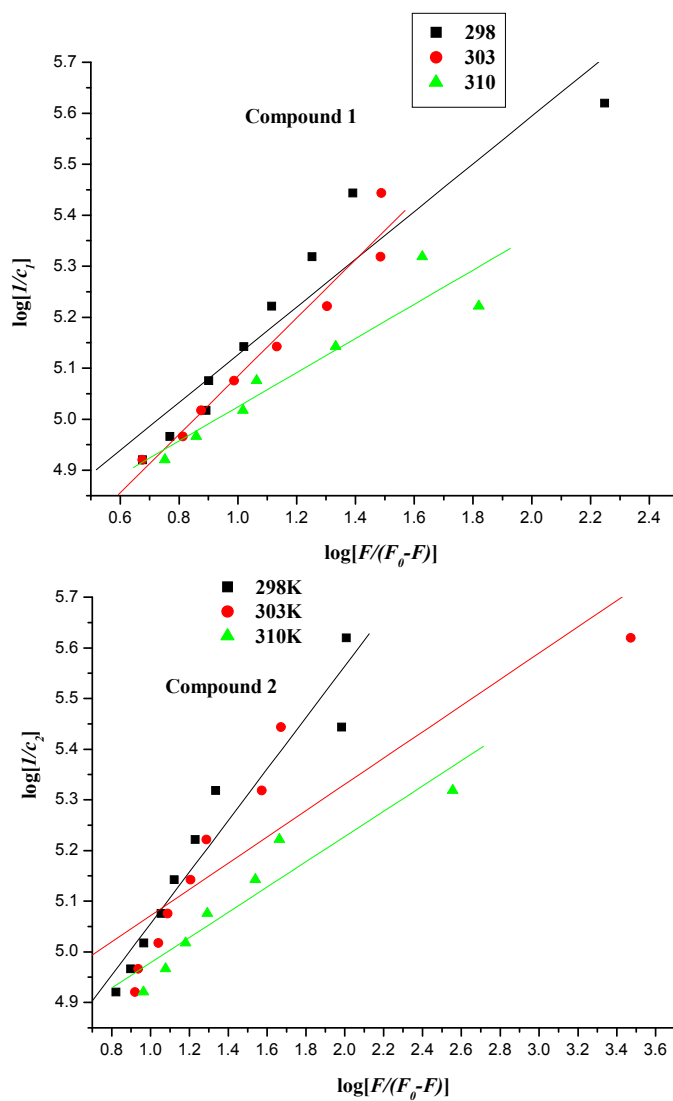

**Figure S4.** Cont.

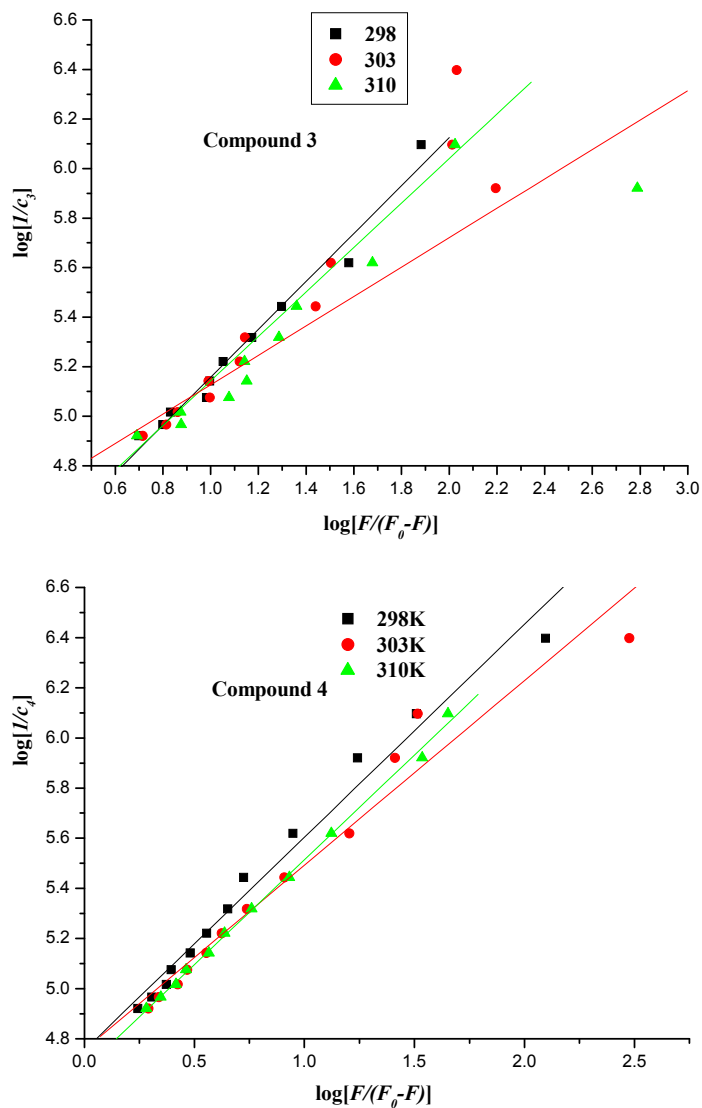

**Figure S4.** Linear plot of  $\log [1/c_{comp.}]$  vs.  $\log [F/(F_0 - F)]$  of the interaction between compounds 1–4 and BSA at different temperatures (Ex = 295 nm).

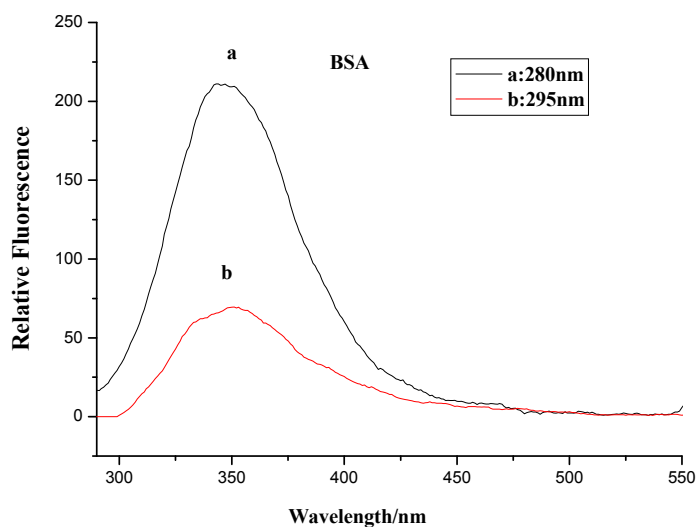

**Figure S5.** The Fluorescence of BSA at Ex = 280 and 295 nm, respectively; slits of both Ex and Em were 5 nm;  $c(\text{BSA}) = 1.04 \times 10^{-6} \text{ mol} \cdot \text{L}^{-1}$ .

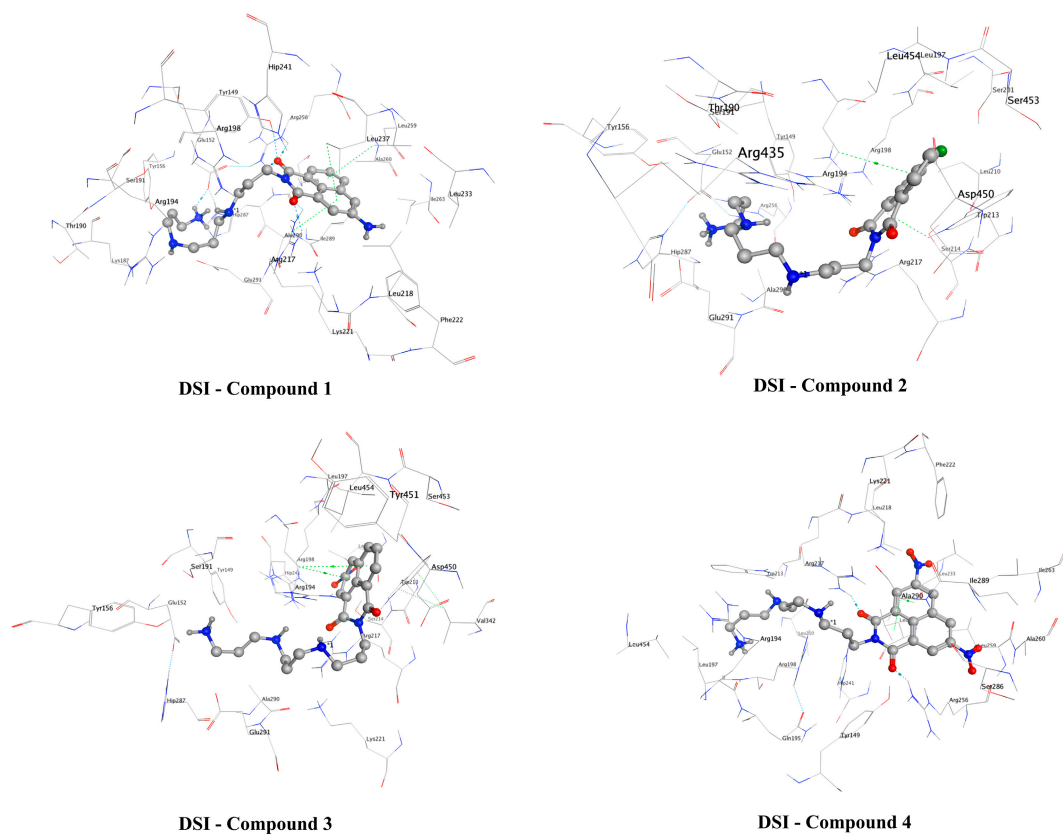

**Figure S6.** The 3D diagram of the best binding mode for the docking of DSI and compounds 1–4 according to the scoring.

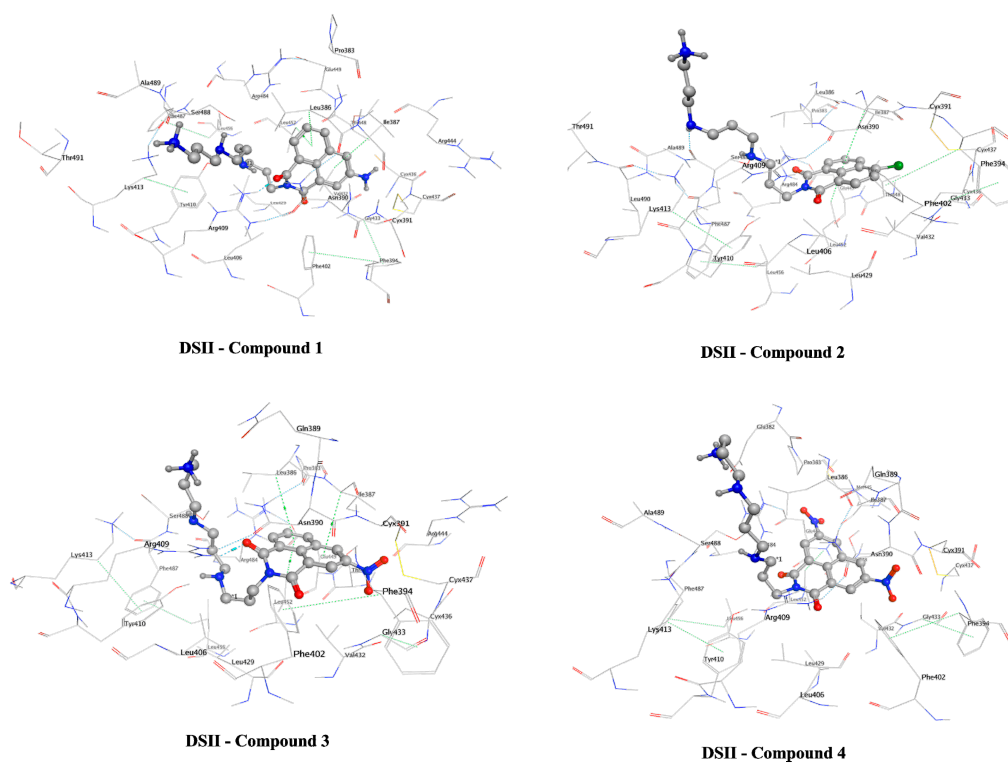

**Figure S7.** The 3D diagram of the best binding mode for the docking of DSII and compounds 1–4 according to the scoring.

**Table S1.** The fluorescence lifetimes of BSA and compounds 1–4-BSA complex.

| Medium           | B <sub>1</sub> | τ <sub>1</sub> (ns) | B <sub>2</sub> | τ <sub>2</sub> (ns) | τ <sub>0</sub> (ns) | x <sup>2</sup> (%) |
|------------------|----------------|---------------------|----------------|---------------------|---------------------|--------------------|
| BSA              | 0.010          | 1.647               | 0.033          | 6.282               | 5.941               | 1.090              |
| BSA + compound 1 | 0.007          | 2.626               | 0.031          | 6.308               | 5.993               | 1.244              |
| BSA + compound 2 | 0.009          | 1.671               | 0.032          | 6.231               | 5.912               | 1.180              |
| BSA + compound 3 | 0.008          | 2.859               | 0.031          | 6.403               | 6.037               | 1.201              |
| BSA + compound 4 | 0.009          | 2.937               | 0.030          | 6.377               | 5.753               | 1.294              |

Note:  $c$  (BSA) =  $1.04 \times 10^{-6}$  mol·L<sup>-1</sup>;  $c$  (compounds 1–4) =  $12.0 \times 10^{-6}$  mol·L<sup>-1</sup>.

**Table S2.** Quenching constant of the interaction between compounds 1–4 and BSA at different temperatures (Ex = 295 nm).

| Compound | T (K) | K <sub>sv</sub> (L·mol <sup>-1</sup> ) | K <sub>q</sub> (L·mol <sup>-1</sup> ) | r     |
|----------|-------|----------------------------------------|---------------------------------------|-------|
| 1        | 298   | $1.950 \times 10^4$                    | $3.282 \times 10^{12}$                | 0.994 |
|          | 303   | $1.970 \times 10^4$                    |                                       | 0.987 |
|          | 310   | $1.810 \times 10^4$                    |                                       | 0.975 |
| 2        | 298   | $1.440 \times 10^4$                    | $2.424 \times 10^{12}$                | 0.995 |
|          | 303   | $1.230 \times 10^4$                    |                                       | 0.993 |
|          | 310   | $1.210 \times 10^4$                    |                                       | 0.984 |
| 3        | 298   | $1.650 \times 10^4$                    | $2.777 \times 10^{12}$                | 0.989 |
|          | 303   | $1.510 \times 10^4$                    |                                       | 0.987 |
|          | 310   | $1.500 \times 10^4$                    |                                       | 0.963 |
| 4        | 298   | $4.660 \times 10^4$                    | $7.844 \times 10^{12}$                | 0.998 |
|          | 303   | $4.320 \times 10^4$                    |                                       | 0.997 |
|          | 310   | $4.450 \times 10^4$                    |                                       | 0.998 |

**Table S3.** Binding constants and thermodynamic parameters of the interaction between compounds 1–4 and BSA at different temperatures (Ex = 295 nm).

| Compound | T(K) | K <sub>b</sub> (L·mol <sup>-1</sup> ) | ΔG° (L·mol <sup>-1</sup> ) | ΔH° (kJ·mol <sup>-1</sup> ) | ΔS° (kJ·mol <sup>-1</sup> ) | r     |
|----------|------|---------------------------------------|----------------------------|-----------------------------|-----------------------------|-------|
| 1        | 298  | $4.556 \times 10^4$                   | -26.576                    | 4.580                       | 0.105                       | 0.950 |
|          | 303  | $3.261 \times 10^4$                   | -26.179                    | 4.580                       | 0.105                       | 0.977 |
|          | 310  | $4.894 \times 10^4$                   | -27.831                    | 4.580                       | 0.105                       | 0.938 |
| 2        | 298  | $3.526 \times 10^4$                   | -25.941                    | 26.781                      | 0.177                       | 0.964 |
|          | 303  | $6.488 \times 10^4$                   | -27.912                    | 26.781                      | 0.177                       | 0.887 |
|          | 310  | $5.358 \times 10^4$                   | -28.064                    | 26.781                      | 0.177                       | 0.945 |
| 3        | 298  | $1.554 \times 10^4$                   | -23.911                    | 50.430                      | 0.250                       | 0.989 |
|          | 303  | $1.754 \times 10^4$                   | -24.618                    | 50.430                      | 0.250                       | 0.957 |
|          | 310  | $3.417 \times 10^4$                   | -26.905                    | 50.430                      | 0.250                       | 0.917 |
| 4        | 298  | $5.688 \times 10^4$                   | -27.126                    | -11.158                     | 0.0536                      | 0.990 |
|          | 303  | $5.709 \times 10^4$                   | -27.591                    | -11.158                     | 0.0536                      | 0.988 |
|          | 310  | $4.778 \times 10^4$                   | -27.769                    | -11.158                     | 0.0536                      | 0.999 |
